# Supplementary material for: Spatial Analysis of COVID-19 Vaccination: A Scoping Review
Source: MDPI journal article supplement (doi:10.3390/ijerph182212024), 2021-11-16
Supplement: s1 [file s1]

## Search Strategies:

### 1- PubMed Search Strategy: (94 articles on 21 September 2021)

(((((COVID-19 Vaccines[MeSH Major Topic]) OR (vaccine\*[Title/Abstract])) OR (Vaccination[Title/Abstract])) AND ((((((("nCoV Infection"[Title]) OR (COVID-19[Title])) OR (Coronavirus[Title])) OR (SARS-CoV-2[Title])) OR (COVID19[Title])) OR (COVID-19[MeSH Major Topic])) AND (((((((((((((((((((("spatial access"[Title/Abstract]) OR (Spatiotemporal[Title/Abstract])) OR ("Spatial Temporal"[Title/Abstract])) OR ("Spatio-Temporal"[Title/Abstract])) OR (Georeference\*[Title/Abstract])) OR (Geocode\*[Title/Abstract])) OR (Geographic\*[Title])) OR ("Geographical information system"[Title/Abstract])) OR ("Geographic Information System"[Title/Abstract])) OR ("Spatio temporal"[Title/Abstract])) OR ("Geographical distribution"[Title/Abstract])) OR ("Geographic distribution"[Title/Abstract])) OR ("Geographic hotspot"[Title/Abstract])) OR ("Geographic cluster"[Title/Abstract])) OR ("Spatial Cluster"[Title/Abstract])) OR ("Spatial hotspot"[Title/Abstract])) OR ("spatial statistics"[Title/Abstract])) OR ("Geographic Information Systems"[MeSH Major Topic])) OR (Spatial analysis[MeSH Major Topic])) OR (Geographic Mapping[MeSH Major Topic])) OR (Spatio-Temporal Analysis[MeSH Major Topic])) OR ("Space time"[Title/Abstract])) OR ("Space-Time"[Title/Abstract])) OR ("spatial analysis"[Title/Abstract])) OR ("Spatial Dependency"[Title/Abstract])) OR ("Spatial inequality"[Title/Abstract])) OR ("Spatial Autocorrelation"[Title/Abstract])) OR (Geospatial[Title])) OR (GIS[Title])) OR ("Geographical mapping"[Title/Abstract])) OR ("Geographic mapping"[Title/Abstract]))

### 2- Scopus Search Strategy: (238 articles on 21 September 2021)

( TITLE-ABS-KEY ( "Spatio-Temporal" OR geocode\* OR "Spatial Autocorrelation" OR georeference\* OR "spatial analysis" OR "Spatial inequality" OR "Spatial Dependency" OR "Space-Time" OR "Spatial Temporal" OR spatiotemporal OR "spatial access\*" OR "Geographical mapping" OR "Geographic mapping" OR "Geographical information system\*" OR "Geographic Information System\*" OR "Spatio temporal" OR "space time" OR "Geographical distribution\*" OR "Geographic distribution\*" OR "spatial statistics" OR "Spatial hotspot\*" OR "Spatial Cluster\*" OR "Geographic cluster\*" OR "Geographic hotspot\*" ) OR TITLE ( geospatial OR gis OR geographic\* ) ) AND ( TITLE ( covid-19 OR coronavirus OR "nCov Infection" OR sars-cov-2 OR covid19 ) ) AND ( TITLE-ABS-KEY ( vaccine\* OR vaccination ) ) AND ( LIMIT-TO ( PUBYEAR , 2021 ) OR LIMIT-TO ( PUBYEAR , 2020 ) )

### 3- Web of Science Search Strategy: (64 articles on 21 September 2021)

(TI= (covid-19) OR TI= (coronavirus) OR TI= ("nCov Infection") OR TI= (sars-cov-

2) OR TI= (covid19)) AND ( TI= (vaccine\*) OR TI= (vaccination) OR AB= (vaccine\*) OR AB= (vaccination) OR AK=(vaccine\*) OR AK=(vaccination)) AND ( TI= ("Spatio-Temporal") OR TI=(geocode\*) OR TI=("Spatial Autocorrelation") OR TI=(georeference\*) OR TI=("spatial analysis") OR TI=("Spatial inequality") OR TI=("Spatial Dependency") OR TI=("Space-Time") OR TI= ("Spatial Temporal") OR TI=(spatiotemporal) OR TI=("spatial access\*") OR TI=("Geographical mapping") OR TI= ("Geographic mapping") OR TI= ("Geographical information system\*") OR TI= ("Geographic Information System\*") OR TI= ("Spatio temporal") OR TI= ("space time") OR TI= ("Geographical distribution\*") OR TI= ("Geographic distribution\*") OR TI= ("spatial statistics") OR TI= ("Spatial hotspot\*") OR TI= ("Spatial Cluster\*") OR TI= ("Geographic cluster\*") OR TI= ("Geographic hotspot\*") OR TI= (geospatial) OR TI= (gis) OR TI= (geographic\*) OR AB= ("Spatio-Temporal") OR AB= (geocode\*) OR AB= ("Spatial Autocorrelation") OR AB= (georeference\*) OR AB= ("spatial analysis") OR AB= ("Spatial inequality") OR AB= ("Spatial Dependency") OR AB= ("Space-Time") OR AB= ("Spatial Temporal") OR AB= (spatiotemporal) OR AB= ("spatial access\*") OR AB= ("Geographical mapping") OR AB= ("Geographic mapping") OR AB= ("Geographical information system\*") OR AB= ("Geographic Information System\*") OR AB= ("Spatio temporal") OR AB= ("space time") OR AB= ("Geographical distribution\*") OR AB= ("Geographic distribution\*") OR AB= ("spatial statistics") OR AB= ("Spatial hotspot\*") OR AB= ("Spatial Cluster\*") OR AB= ("Geographic cluster\*") OR AB= ("Geographic hotspot\*") )

*Indexes=SCI-EXPANDED, SSCI, A&HCI, ESCI Timespan=2020-2021*
